# Supplementary material for: Intellectual disability-associated gain-of-function mutations in CERT1 that encodes the ceramide transport protein CERT
Source: PubMed Central journal article supplement (PMC7751862; doi:10.1371/journal.pone.0243980), 2020-12-21

# S2 Fig

A

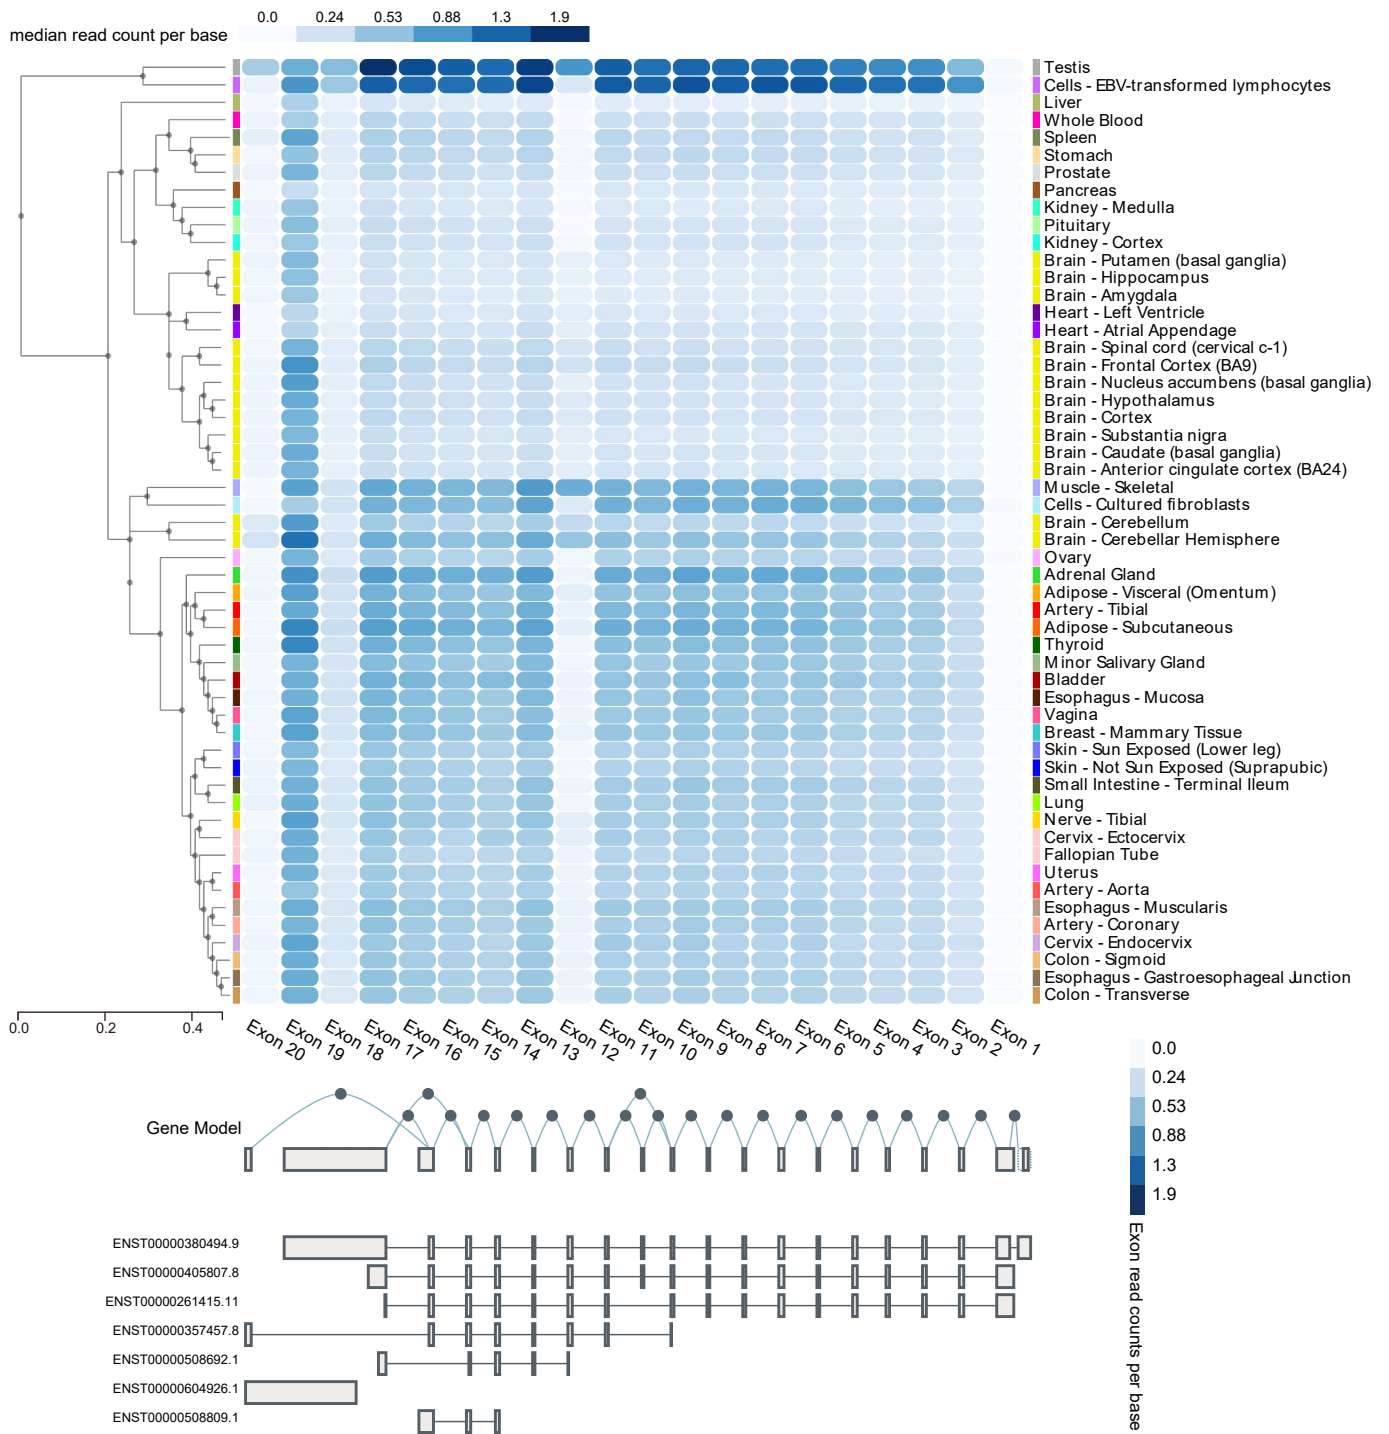

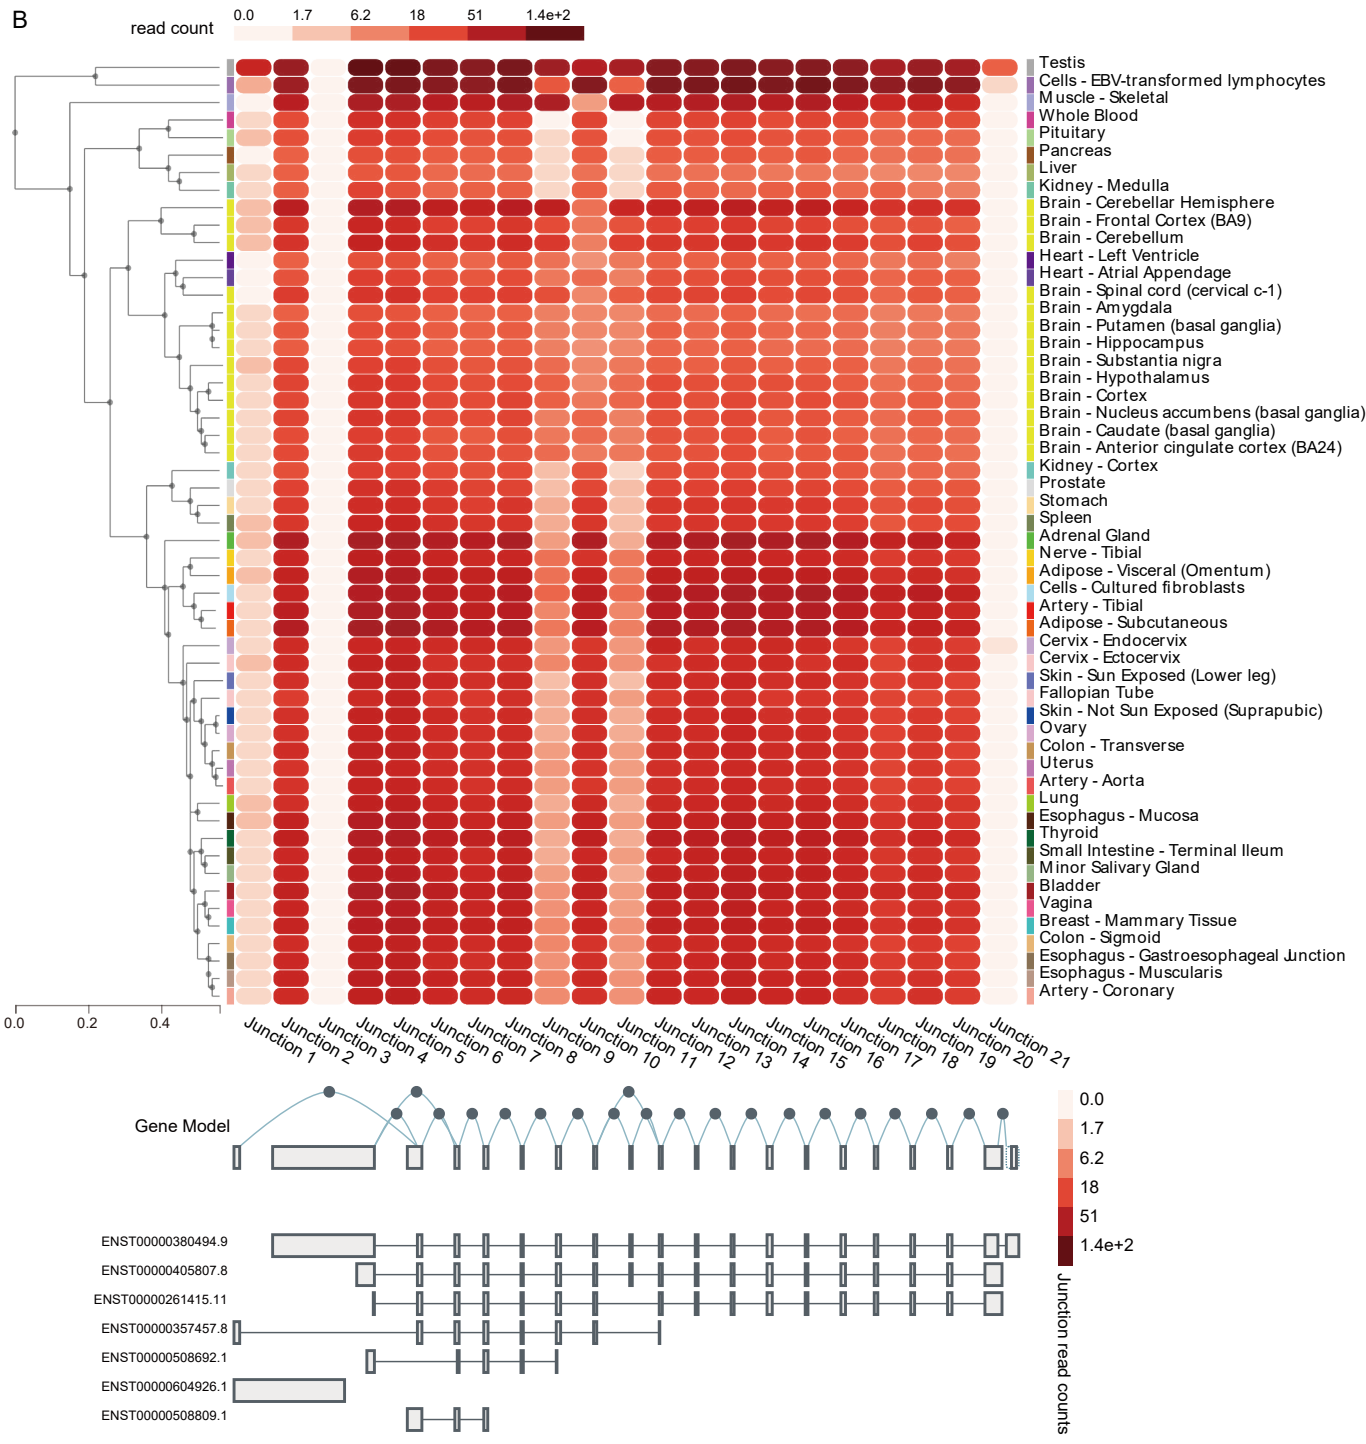

Supplement: pone.0243980.s002.pdf [file pone.0243980.s002.pdf]
