# Supplementary material for: Intellectual disability-associated gain-of-function mutations in CERT1 that encodes the ceramide transport protein CERT
Source: PubMed Central journal article supplement (PMC7751862; doi:10.1371/journal.pone.0243980), 2020-12-21

Full unedited gel for Figure 3

3A  $\alpha$ CERT

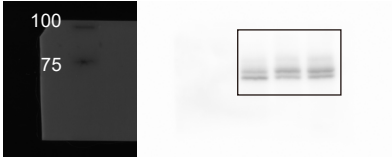

$\beta$ -actin

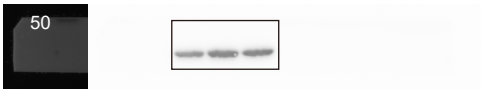

Full unedited gel for Figure 3

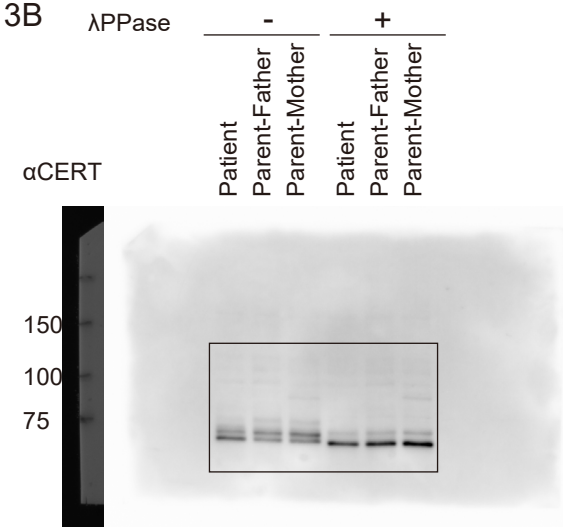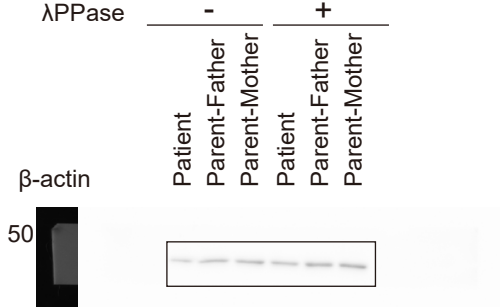

Full unedited gel for Figure 4

4A

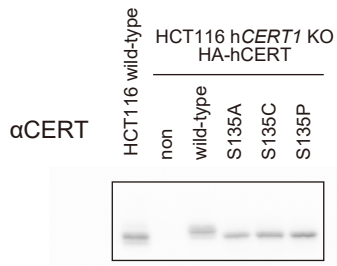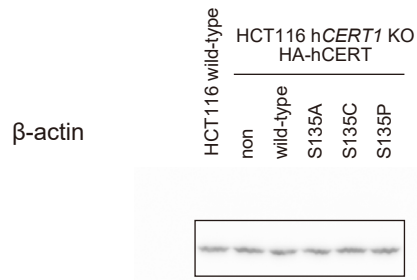

$\alpha$ HA

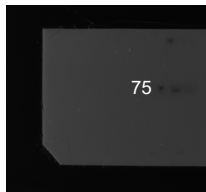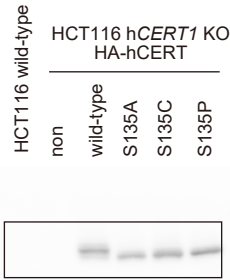

Full unedited gel for Figure 5

5A

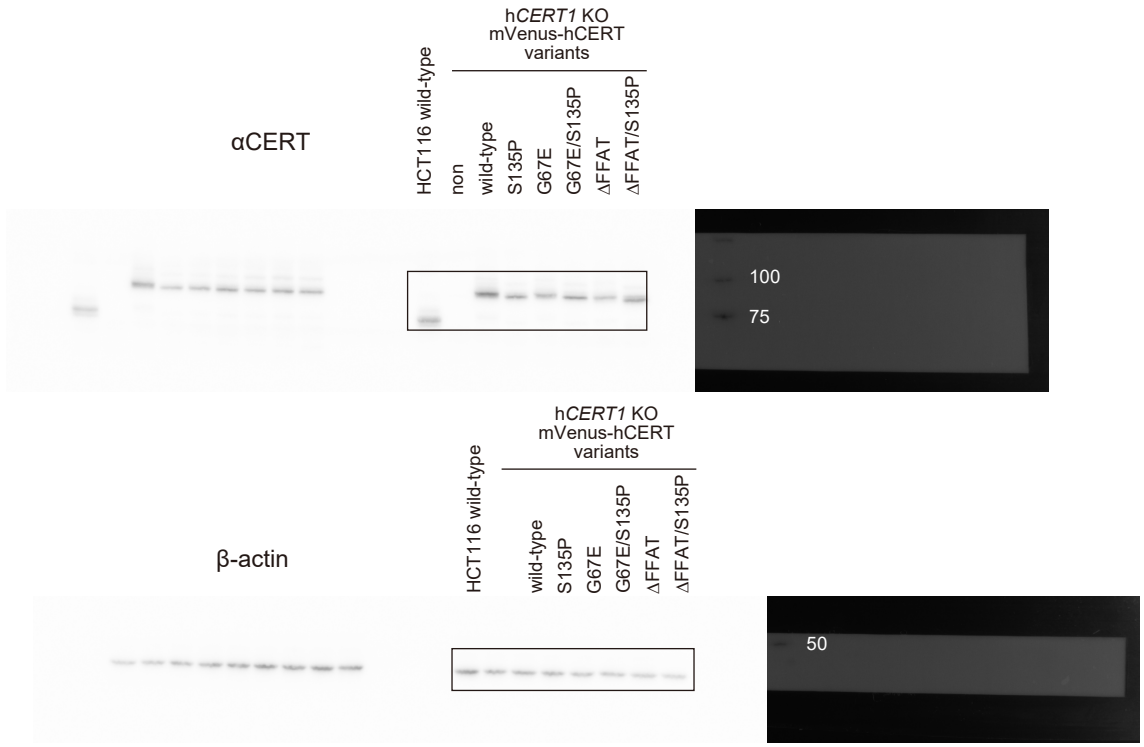

Full unedited gel for Supporting figure 3

3A

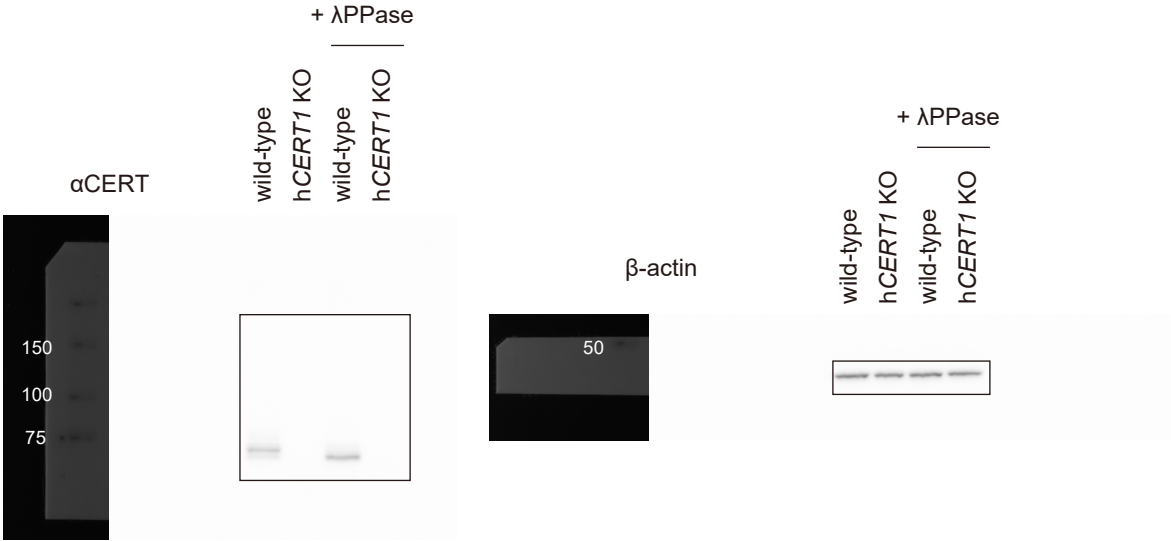

Full unedited gel for Supporting figure 3

3B

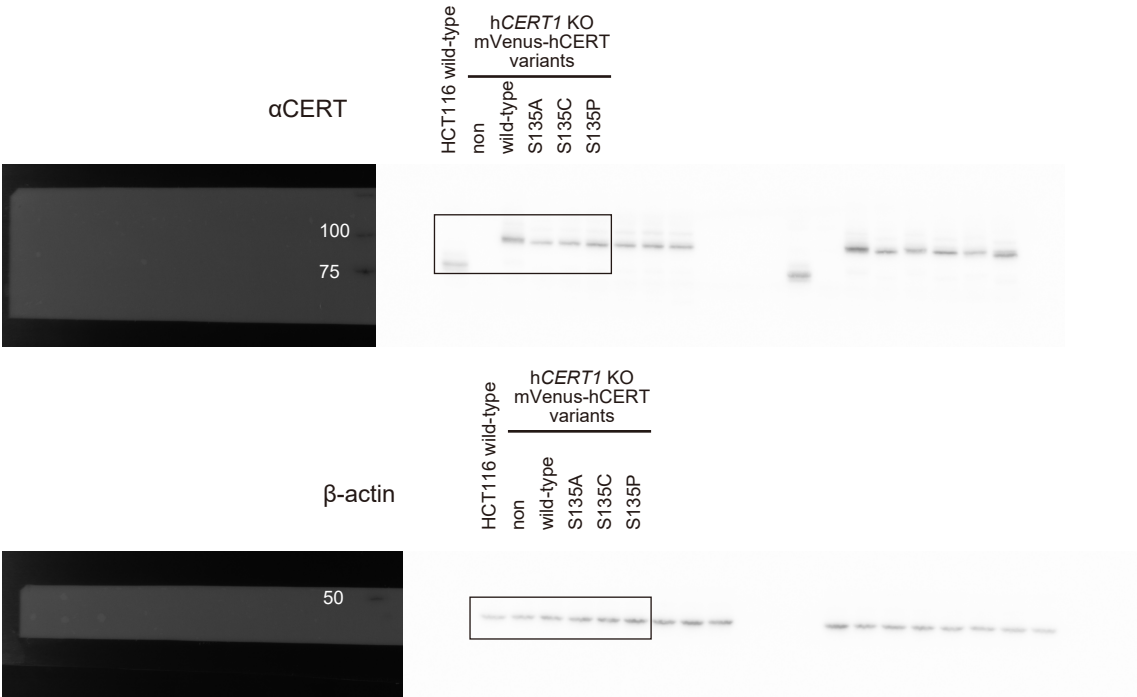

Full unedited gel for Supporting figure 4

4A

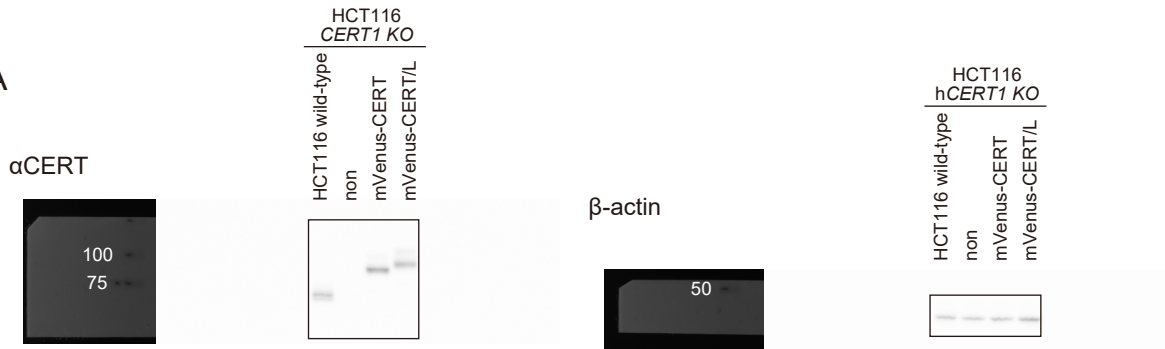

Supplement: pone.0243980.s005.pdf [file pone.0243980.s005.pdf]
